RESEARCH ARTICLE

# Comorbidity and dementia: A nationwide survey in Taiwan

Ting-Bin Chen<sup>1</sup>, Szu-Yu Yiao<sup>2</sup>, Yu Sun<sup>3,4</sup>, Huey-Jane Lee<sup>5</sup>, Shu-Chien Yang<sup>5</sup>, Ming-Jang Chiu<sup>3,6,7</sup>, Ta-Fu Chen<sup>3</sup>, Ker-Neng Lin<sup>8,9</sup>, Li-Yu Tang<sup>5</sup>, Chung-Chih Lin<sup>10</sup>, Pei-Ning Wang<sup>9,11,12\*</sup>

**1** Department of Neurology, Neurological Institute, Taichung Veterans General Hospital, Taichung, Taiwan, **2** Department of Biostatistics, Columbia University Mailman School of Public Health, New York, NY, United States of America, **3** Department of Neurology, National Taiwan University Hospital, Taipei, Taiwan, **4** Department of Neurology, En Chu Kong Hospital, New Taipei City, Taiwan, **5** Taiwan Alzheimer's Disease Association, Taipei, Taiwan, **6** Graduate Institute of Brain and Mind Sciences, College of Medicine, National Taiwan University, Taipei, Taiwan, **7** Graduate Institute of Psychology, College of Science, National Taiwan University, Taipei, Taiwan, **8** Department of Psychology, Soo-Chow University, Taipei, Taiwan, **9** Department of Neurology, Neurological Institute, Taipei Veterans General Hospital, Taipei, Taiwan, **10** Department of Computer Science and Information Engineering, Chung Gung University, Tao-Yuan, Taiwan, **11** Department of Neurology, National Yang-Ming University School of Medicine, Taipei, Taiwan, **12** Aging and Health Research Center, National Yang-Ming University, Taipei, Taiwan

\* [pnwang@vghtpe.gov.tw](mailto:pnwang@vghtpe.gov.tw)

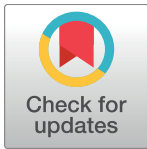

**OPEN ACCESS**

**Citation:** Chen T-B, Yiao S-Y, Sun Y, Lee H-J, Yang S-C, Chiu M-J, et al. (2017) Comorbidity and dementia: A nationwide survey in Taiwan. PLoS ONE 12(4): e0175475. <https://doi.org/10.1371/journal.pone.0175475>

**Editor:** Kewei Chen, Banner Alzheimer's Institute, UNITED STATES

**Received:** November 11, 2016

**Accepted:** March 14, 2017

**Published:** April 12, 2017

**Copyright:** © 2017 Chen et al. This is an open access article distributed under the terms of the [Creative Commons Attribution License](https://creativecommons.org/licenses/by/4.0/), which permits unrestricted use, distribution, and reproduction in any medium, provided the original author and source are credited.

**Data Availability Statement:** Due to legal restrictions imposed by the government of Taiwan in relation to the Personal Information Protection Law, data cannot be made publicly available. Requests for a de-identifying data set from this study may be sent to the Taiwan Alzheimer's Disease Association (TADA) at [tada.tada@msa.hinet.net](mailto:tada.tada@msa.hinet.net).

**Funding:** This project was supported in part by the Ministry of Health and Welfare of Taiwan (DOH100-TD-M113-100001), National Science Council of Taiwan (NSC 101-2314-B-010, NSC

## Abstract

### Background

Comorbid medical diseases are highly prevalent in the geriatric population, imposing hardship on healthcare services for demented individuals. Dementia also complicates clinical care for other co-existing medical conditions. This study investigated the comorbidities associated with dementia in the elderly population aged 65 years and over in Taiwan.

### Methods

We conducted a nationwide, population-based, cross-sectional survey; participants were selected by computerized random sampling from all 19 Taiwan counties between December 2011 and March 2013. After exclusion of incomplete or erroneous data, 8,456 subjects were enrolled. Of them, 6,183 were cognitively normal (control group), 1,576 had mild cognitive impairment (MCI), and 697 had dementia. We collected information about types of comorbidities (i.e., vascular risk factors, lung diseases, liver diseases, gastrointestinal diseases, and cancers), Charlson comorbidity index score, and demographic variables to compare subjects with normal cognition, MCI, and dementia.

### Results

Regardless of the cognitive condition, over 60% of the individuals in each group had at least one comorbid disease. The proportion of subjects possessing at least three comorbidities was higher in those with cognitive impairment (MCI 20.9%, dementia 27.3%) than in control group (15%). Hypertension and diabetes mellitus were the most common comorbidities. The mean number of comorbidities and Charlson comorbidity index score were greater in

102-2314-B-010-051-MY2), Taipei-Veterans General Hospital (V104C-059), and TADA (Taiwan Alzheimer's Disease Association). The funders had no role in study design, data collection and analysis, decision to publish, or preparation of the manuscript.

**Competing interests:** The authors have declared that no competing interests exist.

MCI and dementia groups than in control group. Logistic regression demonstrated that the comorbidities significantly associated with MCI and dementia were cerebrovascular disease (OR 3.35, CI 2.62–4.28), cirrhosis (OR 3.29, CI 1.29–8.41), asthma (OR 1.56, CI 1.07–2.27), and diabetes mellitus (OR 1.24, CI 1.07–1.44).

## Conclusion

Multiple medical comorbid diseases are common in older adults, especially in those with cognitive impairment. Cerebrovascular disease, cirrhosis, asthma, and diabetes mellitus are important contributors to cognitive deterioration in the elderly. Efforts to lower cumulative medical burden in the geriatric population may benefit cognitive function.

## Introduction

The incidence of dementia increases with age and puts a profound socioeconomic burden on care-givers and healthcare systems in Taiwan [1,2]. A nationwide, population-based, cross-sectional survey of the Taiwanese population aged 65 years or older between 2011 and 2013 demonstrated that the age-adjusted prevalence of mild cognitive impairment (MCI) was 18.7%, and that of all-cause dementia was 8.04%; its frequency increases strongly with age, from 3.4% in people aged 65–69 years to 36.8% in those aged 90 years or older [3]. With the population aging, the number of people with dementia in Taiwan is estimated to increase substantially, doubling every 20 years, and is expected to reach 0.32 million by 2030 and to exceed 0.6 million by 2050 [4].

Although dementia cannot be cured and ultimately may lead to severe disability and institutionalization, reducing the risk of developing dementia takes on added importance in the absence of a disease-modifying treatment. Previous studies have highlighted that a number of non-modifiable risk factors, such as age and apolipoprotein E genotype, were strongly associated with dementia [5]. Emphasis should be placed on understanding which potentially modifiable lifestyle and medical factors might alter the risk of dementia. Identifying these risk factors that hasten the onset and progression of dementia is crucial for timely medical intervention and predicting prognosis. Improved knowledge of the comorbidities of highly prevalent chronic health problems in patients with dementia would facilitate the development of preventive strategies aimed at slowing or avoiding rapid clinical and functional deterioration. Therefore, risk factor modification and reduction will become a fundamental strategy in clinical practice and a focus of public health efforts, in view of the increasing longevity of populations worldwide.

Patients with dementia have, on average, 2 to 8 additional chronic comorbid illnesses [6,7]. Comorbidities not only complicate dementia care and decrease health-related quality of life, but also might reveal shared mechanisms between disorders and provide insight into dementia pathogenesis. Accumulating evidence has shown that vascular risk factors (VRFs), including hypertension, diabetes mellitus (DM), hyperlipidemia, and cerebrovascular disease, are associated with cognitive impairment and dementia [8–11]. Aside from VRFs, several chronic medical disorders, such as hypertension, chronic heart failure, arrhythmia, and diabetes mellitus, have been reported to be related to cognitive dysfunction and brain pathology and even to co-occur in dementia, interacting with each other [12,13].

Similar to Western societies, age, sex, family history of dementia, and apolipoprotein E epsilon 4 allele are proven to be the major risk factors for dementia in Taiwan [14–17]. However, none of these risk factors can be modified by medical interventions or by individual behavior.

Until now, there have not been any reports regarding the relationship between concurrent chronic disorders and developing dementia in the Taiwanese population. To address this issue and pursue preventive approaches, we conducted the first nationwide, population-based, cross-sectional survey in Taiwan to investigate the epidemiology and risk factors in dementia and the association of comorbid illnesses with mild cognitive impairment (MCI) and dementia among people aged 65 years and older.

## Methods

### Study design and sampling

This study was a nationwide, population-based, cross-sectional survey with participants enrolled between December 2011 and March 2013. With the assistance of the Ministry of Health and Welfare of Taiwan and local city governments, our study team obtained the address lists needed. All participants aged 65 years and older were randomly sampled and recruited to achieve a nationally representative sample. The details of this study are described elsewhere [3,18]. This study was approved by the ethics committee at the National Taiwan University Hospital. Permission for interview and written informed consent were obtained from each elder but if that was not possible, from the closest responsible adult. In addition, verbal consent was asked from the participant and the informant when the study was explained verbally at the start.

All the subjects completed the survey using door-to-door screenings [3]. We performed in-person interviews to collect a brief history focusing on cognitive and functional status, followed by a structured questionnaire recording demographic data, medical comorbidities, lifestyle habit factors, and mental tests. The medical comorbid conditions were categorized as vascular risk factors (i.e., hypertension, DM, cerebrovascular disease, and hyperlipidemia), lung diseases, liver diseases, gastrointestinal diseases, and cancers. The lifestyle habit factors, including social activity, regular exercise, smoking, drinking, chewing betel nuts, sleep habits, and marital status, were recorded based on the definitions [18]. The interview process was performed according to an operational manual that defines all variables examined in this questionnaire. Logic checks for inconsistency and auditing were performed by experienced supervisors to ensure the quality and reliability of the entered data [3]. A medical history was taken to detect any insidious change of behavior or personality and any mental decline from previous levels of functioning [3].

### Diagnostic criteria

The diagnosis for all-cause dementia was based on the core clinical criteria recommended by the National Institute on Aging-Alzheimer's Association (NIA-AA). Cognitive and functional status were determined from the evaluation with the participant or a knowledgeable informant who had taken care of the people with dementia for more than 10 hours a week and were capable of detecting insidious changes in behavior, personality, decline in mentality or function at work, or activities of daily living (ADL). Objective assessments included the Clinical Dementia Rating Scale (CDR) and the Taiwanese Mini-Mental State Evaluation (T-MMSE). Normal T-MMSE results were defined as a score  $>24$  in literate elderly people and  $>13$  in illiterate elderly people [19]. Participants who were compatible with the NIA-AA criteria for all-cause dementia were those with impairment in 2 or more cognitive domains as well as a decline in daily functions, whereby the cognitive deficits were sufficient to interfere with independence of daily living function as a result of abnormality in community affairs or at-home hobbies or personal care, as assessed by the CDR. Functional status was assessed using the ADL scale and the instrumental activities of daily living (IADL) scale. MCI was diagnosed, based on the criteria recommended by the NIA-AA, as a change in cognition with impairment in 1 or more cognitive domains but no evidence of impairment in social or occupational functioning as

assessed by the CDR, ADL, and IADL [20]. An individual was considered cognitively normal when one had none of the conditions listed in the NIA-AA core clinical criteria for all-cause dementia and have a CDR score of 0 as well as an education adjusted T-MMSE within normal limits. People with major depression, other mental disorders, delirium, or other serious physical problems leading to cognitive or functional status impairment did not fulfill the NIA-AA criteria for all-cause dementia and MCI and were therefore excluded.

The diagnosis of dementia, particularly difficult cases, was re-examined and discussed by a consultant panel consisting of four neurologists and one clinical psychologist specialized in the diagnosis and management of patients with dementia. The sampling process, training of interviewers, home visiting procedure, quality control, and protocol approvals were detailed in our previous report [3]. All interviews were conducted by well-trained field interviewers with continuous quality control to achieve necessary quality standards. The inter-rater reliability of global Clinical Dementia Rating was substantial, with a kappa value of 0.671 [3].

## Statistical analysis

Continuous variables are reported as means  $\pm$  standard deviations. Categorical variables are represented by frequency or percentage. The Charlson comorbidity index (CCI) and number of comorbidities were analyzed to determine overall systemic health [21]. In the CCI, dementia was not taken into account given its presence in the cohort study. Univariate logistic regression analysis was used to assess the association between all comorbidity variables and MCI or dementia and to calculate crude odds ratio (OR) and its 95% confidence interval (CI). Factors with a  $p$ -value  $< 0.1$  in univariate regression analyses were entered into the multivariate analyses. Multivariate logistic regression model 1 was adjusted for age group, sex, education level, and body mass index category. Model 2 represented model 1 plus adjustment for lifestyle habit factors. We calculated the adjusted OR value and its 95% CI for MCI and dementia. All analyses were performed using SAS statistical software (version 9.4) with 2-tailed statistical tests.

## Results

Of the 10,571 subjects interviewed, 2,118 were excluded due to incomplete or possibly erroneous data, and finally, 8,456 subjects were enrolled. Of the 8,456 participants, 697 (8.2%) fulfilled the NIA-AA core clinical criteria for all-cause dementia and 1,576 (18.6%) fitted the criteria for MCI, whereas 6,183 (73.1%) were cognitively normal. Subjects with MCI and dementia were approximately three years and seven years older than those with normal cognitive function, respectively. [Table 1](#) shows the demographic characteristics of all participants.

[Table 2](#) represents the detailed information of each comorbid illness among the three study groups. Overall, hypertension and DM were the most common comorbid diseases. The mean number of comorbidities in the population with MCI ( $1.51 \pm 1.37$ ) and dementia ( $1.73 \pm 1.50$ ) was significantly higher than that in the population with normal cognition ( $1.29 \pm 1.24$ ). Among the elderly with normal cognition, 68.3% had one or more comorbidities and 15.6% possessed at least three. Among the subjects with MCI, 72.4% had at least one comorbid diseases and 20.9% possessed at least three. Among the participants with dementia, 75.5% had one or more comorbid diseases and 27.3% possessed at least three.

The severity of comorbid diseases was scored according to CCI. The mean CCI score in the participants with MCI ( $0.49 \pm 0.83$ ) and dementia ( $0.73 \pm 0.96$ ) was significantly greater than that in the cognitively normal subjects ( $0.40 \pm 0.75$ ). The distribution patterns of the number of comorbidities and CCI score were different across three study groups ([Table 2](#)). The proportion of those with index scores of 1–2, 3–4, and  $\geq 5$  was significantly higher in those with MCI and dementia than in the normal control group ([Table 2](#)).

**Table 1. Demographic data of study participants (n = 8,456).**

| Continuous variables, n, %         |               | Normal (n = 6,183) |       | MCI (n = 1,576) |       | Dementia (n = 697) |       |
|------------------------------------|---------------|--------------------|-------|-----------------|-------|--------------------|-------|
|                                    |               | Mean               | SD    | Mean            | SD    | Mean               | SD    |
| Age                                |               | 74.85              | 6.04  | 77.55           | 6.70  | 81.61              | 7.63  |
|                                    | Men           | 75.42              | 6.24  | 78.30           | 6.86  | 81.27              | 7.74  |
|                                    | Women         | 74.25              | 5.76  | 77.06           | 6.55  | 81.80              | 7.56  |
| Categorical variables, n, %        |               | n                  | %     | n               | %     | n                  | %     |
| Women                              |               | 3,007              | 48.63 | 951             | 60.34 | 443                | 63.56 |
| Age, years                         |               |                    |       |                 |       |                    |       |
|                                    | 65–74         | 3,339              | 54.00 | 571             | 36.23 | 134                | 19.23 |
|                                    | 75–84         | 2,397              | 38.77 | 747             | 47.40 | 304                | 43.62 |
|                                    | ≥ 85          | 447                | 7.23  | 258             | 16.37 | 259                | 37.16 |
| Education, years                   |               |                    |       |                 |       |                    |       |
|                                    | 0             | 2,078              | 33.61 | 928             | 58.88 | 417                | 59.83 |
|                                    | 1–6           | 2,391              | 38.67 | 439             | 27.86 | 180                | 25.82 |
|                                    | 7–12          | 1,201              | 19.42 | 149             | 9.45  | 70                 | 10.04 |
|                                    | > 12          | 513                | 8.30  | 60              | 3.81  | 30                 | 4.30  |
| Body Mass Index (BMI) <sup>a</sup> |               |                    |       |                 |       |                    |       |
|                                    | ≤ 18          | 140                | 2.26  | 48              | 3.05  | 23                 | 3.30  |
|                                    | 18 < BMI ≤ 24 | 2,853              | 46.14 | 591             | 37.50 | 311                | 44.62 |
|                                    | 24 < BMI ≤ 30 | 2,299              | 37.18 | 525             | 33.31 | 178                | 25.54 |
|                                    | > 30          | 258                | 4.17  | 64              | 4.06  | 27                 | 3.87  |

MCI: mild cognitive impairment; SD, standard deviation.

<sup>a</sup> There were 1,139 subjects with missing data in the BMI category.

<https://doi.org/10.1371/journal.pone.0175475.t001>

Table 3 demonstrates the association between each comorbid illness with MCI and dementia using univariate logistic regression analyses. Associated factors with increased odds for both MCI and dementia were DM, cerebrovascular disease, lung disease, asthma, and cirrhosis. Factors only associated with MCI were hypertension, hyperlipidemia, and gastrointestinal disease, and only with dementia included tuberculosis, pneumonia, chronic obstructive pulmonary disease, other lung disease, and cancer.

After adjusting for sex, age, educational level, BMI (model 1, Table 4) or additional lifestyle habit factors (model 2, Table 4), cerebrovascular disease, cirrhosis, asthma, and DM were still associated with MCI and dementia. These four risk factors remained consistent with model 1 and model 2 when grouping both MCI and dementia as cognitive impairment.

Table 4 illustrates the adjusted ORs for association with cognitive impairment regarding comorbidities. In comparison with people without cerebrovascular disease, the adjusted OR of cognitive impairment was 3.35 (95% CI = 2.62–4.28) in those with cerebrovascular disease. Compared with people without cirrhosis, the OR in those with cirrhosis was 3.29 (95% CI = 1.29–8.41). The OR was 1.56 (95% CI = 1.07–2.27) in subjects with asthma, compared with those without asthma. Compared with people without DM, the OR in people with DM was 1.24 (95% CI = 1.07–1.44).

## Discussion

In this population-based, cross-sectional survey, over 60% of both cognitively preserved and cognitively impaired older individuals had comorbid medical conditions. Hypertension and DM were the most frequent comorbid diseases. The magnitude and pattern of comorbidity

**Table 2. Comorbidities of study participants (n = 8,456).**

| Categorical variables, n, %          |                               | Normal (n = 6,183) |       | MCI (n = 1,576) |       | Dementia (n = 697) |       |
|--------------------------------------|-------------------------------|--------------------|-------|-----------------|-------|--------------------|-------|
|                                      |                               | n                  | %     | n               | %     | n                  | %     |
| Comorbidities                        |                               |                    |       |                 |       |                    |       |
| Vascular risk factor                 |                               |                    |       |                 |       |                    |       |
|                                      | Hypertension                  | 3,075              | 49.70 | 833             | 52.86 | 369                | 52.94 |
|                                      | Diabetes mellitus             | 1,204              | 19.47 | 356             | 22.59 | 214                | 30.70 |
|                                      | CVD                           | 204                | 3.30  | 122             | 7.74  | 129                | 18.51 |
|                                      | Hyperlipidemia                | 1,157              | 18.71 | 342             | 21.70 | 117                | 16.79 |
| Lung disease                         |                               | 282                | 4.56  | 100             | 6.35  | 77                 | 11.05 |
|                                      | Tuberculosis                  | 43                 | 0.70  | 9               | 0.57  | 12                 | 1.72  |
|                                      | Pneumonia                     | 22                 | 0.36  | 9               | 0.57  | 12                 | 1.72  |
|                                      | COPD                          | 16                 | 0.26  | 7               | 0.44  | 6                  | 0.86  |
|                                      | Asthma                        | 123                | 1.99  | 48              | 3.05  | 32                 | 4.59  |
|                                      | Benign lung tumor             | 20                 | 0.32  | 5               | 0.32  | 3                  | 0.43  |
|                                      | Other lung diseases           | 56                 | 0.91  | 21              | 1.33  | 17                 | 2.44  |
| Liver disease                        |                               | 284                | 4.59  | 90              | 5.71  | 33                 | 4.73  |
|                                      | Hepatitis                     | 164                | 2.65  | 51              | 3.24  | 16                 | 2.30  |
|                                      | Cirrhosis                     | 12                 | 0.19  | 8               | 0.51  | 5                  | 0.72  |
|                                      | Benign liver tumor            | 19                 | 0.31  | 5               | 0.32  | 2                  | 0.29  |
|                                      | Diagnosed liver disease       | 73                 | 1.18  | 21              | 1.33  | 10                 | 1.43  |
| Gastrointestinal disease             |                               | 1,008              | 16.30 | 300             | 19.04 | 110                | 15.78 |
| Cancer                               |                               | 280                | 4.53  | 59              | 3.74  | 53                 | 7.60  |
|                                      | Liver cancer                  | 15                 | 0.24  | 6               | 0.38  | 4                  | 0.57  |
|                                      | Cervical cancer               | 20                 | 0.32  | 6               | 0.38  | 2                  | 0.29  |
|                                      | Colorectal cancer             | 55                 | 0.89  | 10              | 0.63  | 11                 | 1.58  |
|                                      | Breast cancer                 | 47                 | 0.76  | 8               | 0.51  | 8                  | 1.15  |
|                                      | Lung cancer                   | 17                 | 0.27  | 3               | 0.19  | 7                  | 1.00  |
|                                      | Gastric cancer                | 17                 | 0.27  | 6               | 0.38  | 3                  | 0.43  |
|                                      | Other cancer                  | 112                | 1.81  | 24              | 1.52  | 17                 | 2.44  |
| Number of comorbidities <sup>a</sup> |                               |                    |       |                 |       |                    |       |
|                                      | 0                             | 1,961              | 31.7  | 436             | 27.6  | 171                | 24.5  |
|                                      | 1                             | 1,938              | 31.3  | 451             | 28.6  | 184                | 26.4  |
|                                      | 2                             | 1,314              | 21.2  | 359             | 22.7  | 152                | 21.8  |
|                                      | ≥ 3                           | 970                | 15.6  | 330             | 20.9  | 190                | 27.2  |
|                                      | Mean number ± SD <sup>b</sup> | 1.29 ± 1.24        |       | 1.51 ± 1.37     |       | 1.73 ± 1.50        |       |
| CCI <sup>a</sup>                     |                               |                    |       |                 |       |                    |       |
|                                      | Score 0                       | 4,471              | 72.31 | 1043            | 66.18 | 357                | 51.22 |
|                                      | Score 1                       | 1,185              | 19.17 | 364             | 23.10 | 225                | 32.28 |
|                                      | Score 2                       | 382                | 6.18  | 123             | 7.80  | 82                 | 11.76 |
|                                      | Score 3                       | 94                 | 1.52  | 29              | 1.84  | 19                 | 2.73  |
|                                      | Score 4                       | 39                 | 0.63  | 7               | 0.44  | 6                  | 0.86  |
|                                      | Score ≥ 5                     | 12                 | 0.19  | 10              | 0.63  | 8                  | 1.15  |
|                                      | Mean score ± SD <sup>b</sup>  | 0.40 ± 0.75        |       | 0.49 ± 0.83     |       | 0.73 ± 0.96        |       |

MCI, mild cognitive impairment; CVD, cerebrovascular disease; COPD, chronic obstructive pulmonary disease; SD, standard deviation; CCI, Charlson comorbidity index.

<sup>a</sup>  $p < .0001$  by Chi-square test to compare group differences.

<sup>b</sup>  $p < .0001$  for normal vs. MCI, normal vs. dementia, MCI vs. dementia by ANOVA with Tukey's post hoc test.

<https://doi.org/10.1371/journal.pone.0175475.t002>



**Table 3. Crude ORs of all comorbidities for MCI and dementia using univariate logistic regression analyses.**

| Variables                | MCI vs. Normal |         |           | Dementia vs. Normal |         |            |
|--------------------------|----------------|---------|-----------|---------------------|---------|------------|
|                          | Crude ORs      | p value | 95% CI    | Crude ORs           | p value | 95% CI     |
| Vascular risk factor     |                |         |           |                     |         |            |
| Hypertension             | 1.13           | 0.03    | 1.01–1.27 | 1.14                | 0.11    | 0.97–1.33  |
| Diabetes mellitus        | 1.21           | 0.01    | 1.06–1.38 | 1.83                | < .01   | 1.52–2.18  |
| Cerebrovascular disease  | 2.46           | < .01   | 1.95–3.10 | 6.66                | < .01   | 5.26–8.44  |
| Hyperlipidemia           | 1.20           | 0.01    | 1.05–1.38 | 0.88                | 0.21    | 0.71–1.08  |
| Lung disease             |                |         |           |                     |         |            |
| Tuberculosis             | 0.82           | 0.59    | 0.40–1.69 | 2.50                | < .01   | 1.31–4.77  |
| Pneumonia                | 1.61           | 0.23    | 0.74–3.50 | 4.91                | < .01   | 2.42–9.96  |
| COPD                     | 1.72           | 0.23    | 0.71–4.19 | 3.35                | 0.01    | 1.31–8.59  |
| Asthma                   | 1.55           | 0.01    | 1.10–2.17 | 2.37                | < .01   | 1.59–3.53  |
| Benign lung tumor        | 0.98           | 0.97    | 0.37–2.62 | 1.33                | 0.64    | 0.40–4.50  |
| Other lung diseases      | 1.48           | 0.13    | 0.89–2.45 | 2.74                | < .01   | 1.58–4.74  |
| Liver disease            |                |         |           |                     |         |            |
| Hepatitis                | 1.23           | 0.21    | 0.89–1.69 | 0.86                | 0.58    | 0.51–1.45  |
| Cirrhosis                | 2.62           | 0.03    | 1.07–6.43 | 3.72                | 0.01    | 1.31–10.58 |
| Benign liver tumor       | 1.03           | 0.95    | 0.39–2.77 | 0.94                | 0.93    | 0.22–4.02  |
| Diagnosed liver disease  | 1.13           | 0.62    | 0.69–1.84 | 1.22                | 0.56    | 0.63–2.37  |
| Gastrointestinal disease |                |         |           |                     |         |            |
|                          | 1.21           | 0.01    | 1.05–1.39 | 0.96                | 0.72    | 0.78–1.19  |
| Cancer                   |                |         |           |                     |         |            |
|                          | 0.82           | 0.17    | 0.62–1.09 | 1.74                | < .01   | 1.28–2.35  |
| Liver cancer             | 1.57           | 0.35    | 0.61–4.06 | 2.37                | 0.13    | 0.79–7.17  |
| Cervical cancer          | 1.18           | 0.73    | 0.47–2.94 | 0.89                | 0.87    | 0.21–3.80  |
| Colorectal cancer        | 0.71           | 0.32    | 0.36–1.40 | 1.79                | 0.08    | 0.93–3.43  |
| Breast cancer            | 0.67           | 0.29    | 0.31–1.41 | 1.52                | 0.28    | 0.71–3.22  |
| Lung cancer              | 0.69           | 0.56    | 0.20–2.37 | 3.69                | < .01   | 1.52–8.92  |
| Gastric cancer           | 1.39           | 0.49    | 0.55–3.52 | 1.57                | 0.47    | 0.46–5.37  |
| Other cancer             | 0.84           | 0.44    | 0.54–1.31 | 1.36                | 0.25    | 0.81–2.27  |

MCI, mild cognitive impairment; COPD, chronic obstructive pulmonary disease; CI, confidence interval; ORs, odds ratios.

<https://doi.org/10.1371/journal.pone.0175475.t003>

strongly involve cognitive impairment, particularly MCI and dementia. We also report evidence that cerebrovascular disease, cirrhosis, asthma, and DM increase the odds for cognitive impairment.

Higher medical comorbidity not only accelerates functional deterioration leading to the under-diagnosis and under-treatment of dementia and comorbid illnesses, but also has significant implications for poorer self-care, immobility, and polypharmacy [22–24]. Our study showed the burden of comorbidities is significantly high in older adults with cognitive impairment.

Several studies concerning comorbidities in subjects with cognitive impairment were conducted in Japan [25], Korea [26], the United States [6,7], the United Kingdom [27], France [28], and Spain [22,29]. The cross-national comparison of detailed information regarding the comorbidity and CCI score is presented in Table 5. Taken as a whole, across different countries, the mean CCI score is 2, but the number and item of common comorbidities vary. Similar to studies from Japan, Korea, and France, we showed that hypertension, DM, and hyperlipidemia are the most common comorbidities among subjects with cognitive impairment [25,26,28].

A large body of literature has indicated that several VRFs play common convergent roles in vascular and neurodegenerative cognitive impairment [30,31]. Our study showed cerebrovascular disease provides the highest risk of MCI and dementia. Cerebrovascular changes, such as

**Table 4. Adjusted ORs for association with cognitive impairment regarding comorbidities.**

| Variables                             | Model 1           |         | Model 2          |         |
|---------------------------------------|-------------------|---------|------------------|---------|
|                                       | ORs (95%CI)       | p value | ORs (95%CI)      | p value |
| Comorbidity                           |                   |         |                  |         |
| Hypertension                          | 0.99 (0.88–1.12)  | 0.88    | 0.98 (0.86–1.11) | 0.77    |
| Diabetes mellitus                     | 1.27 (1.10–1.46)  | < .01   | 1.24 (1.07–1.44) | < .01   |
| Cerebrovascular disease               | 3.66 (2.89–4.64)  | < .01   | 3.35 (2.62–4.28) | < .01   |
| Hyperlipidemia                        | 0.99 (0.85–1.16)  | 0.92    | 0.98 (0.83–1.15) | 0.81    |
| Tuberculosis                          | 1.37 (0.74–2.54)  | 0.31    | 1.58 (0.84–2.97) | 0.16    |
| Pneumonia                             | 1.96 (0.94–4.07)  | 0.07    | 1.94 (0.91–4.12) | 0.09    |
| Chronic obstructive pulmonary disease | 2.17 (0.86–5.43)  | 0.10    | 1.88 (0.73–4.87) | 0.19    |
| Asthma                                | 1.65 (1.15–2.38)  | < .01   | 1.56 (1.07–2.27) | 0.02    |
| Other lung diseases                   | 1.58 (0.94–2.65)  | 0.08    | 1.54 (0.90–2.63) | 0.12    |
| Cirrhosis                             | 4.04 (1.62–10.08) | < .01   | 3.29 (1.29–8.41) | 0.01    |
| Gastrointestinal disease              | 1.00 (0.86–1.18)  | 0.96    | 1.01 (0.86–1.19) | 0.91    |
| Cancer                                | 1.10 (0.80–1.52)  | 0.56    | 0.99 (0.71–1.39) | 0.96    |
| Colorectal cancer                     | 0.79 (0.40–1.59)  | 0.51    | 0.86 (0.42–1.78) | 0.69    |
| Lung cancer                           | 1.40 (0.48–4.11)  | 0.54    | 1.36 (0.43–4.27) | 0.60    |

Model 1 indicates model adjusted for age group, gender, education level, and BMI category.

Model 2 indicates model adjusted for age, gender, education level, BMI category, and lifestyle habit factors.

CI: confidence interval; ORs: odds ratios.

<https://doi.org/10.1371/journal.pone.0175475.t004>

hemorrhagic infarct, small and large cortical infarct, vasculopathy, and white matter change, considerably impede trophic coupling in neurovascular units and cause cognitive decline [32,33].

**Table 5. Cross-national comparison of comorbidities in cognitive impairment.**

|               | n      | Female, % | Age, mean                   | CCI, mean ± SD                         | number of comorbidity       | Common comorbidities                                                                                                    |
|---------------|--------|-----------|-----------------------------|----------------------------------------|-----------------------------|-------------------------------------------------------------------------------------------------------------------------|
| Taiwan        | 2,273  | 61.3      | MCI: 77.5<br>Dementia: 81.6 | MCI: 0.4<br>Dementia: 0.7 <sup>a</sup> | MCI: 1.51<br>Dementia: 1.73 | Cerebrovascular disease, Cirrhosis, Asthma, DM                                                                          |
| Japan (2010)  | 113    | 76.1      | 78.6                        | –                                      | 2.27                        | Hyperlipidemia, Hypertension                                                                                            |
| Korea (2011)  | 1,786  | 67        | 71.4                        | –                                      | –                           | Hypertension, Anemia, DM                                                                                                |
| US (2002)     | 15,013 | 69.8      | –                           | –                                      | 7.2–8.13                    | Femoral neck fracture, Urinary tract infection, Convulsion                                                              |
| US (2006)     | 107    | 62.6      | 75.6                        | –                                      | 2.4                         | Hypertension, DM                                                                                                        |
| UK (2011)     | 1,486  | 52.1      | MCI: 73<br>Dementia: 80     | –                                      | –                           |                                                                                                                         |
| France (2005) | 579    | 72        | 77.4                        | 1.5 ± 0.9                              | –                           | Hypertension, Hyperlipidemia                                                                                            |
| Spain (2009)  | 515    | 70        | 81                          | 2 ± 1.2                                | –                           |                                                                                                                         |
| Spain (2014)  | 3,971  | 70.1      | 80.2                        | –                                      | 3.69                        | Anxiety, Chronic skin ulcers, Parkinson’s disease, Anemia, Cerebrovascular disease, Cardiac arrhythmia, Thyroid disease |

CCI, Charlson comorbidity index; DM, diabetes mellitus; –, not available.

<sup>a</sup> dementia is not taken into account, given its presence in dementia group.

<https://doi.org/10.1371/journal.pone.0175475.t005>



DM was the other VRF associated with increased risk of cognitive impairment in our study. Disturbance in insulin signaling is the underlying mechanism in DM, and it affects cell growth, cerebral energy homeostasis, blood-brain barrier integrity, glial function, oxidative stress, and inflammatory response in the central nervous system [34–36]. Through the common pathway of insulin resistance and complex metabolic disorders, DM is notably associated with cognitive decline in the elderly [37].

Cirrhosis was an independent risk factor for cognitive impairment in our study. A wide range of neurocognitive disorders in cirrhotic patients with or without overt hepatic encephalopathy may be caused by a direct influence of cirrhosis on the nervous system or by substances or diseases that act on the brain and liver concurrently (e.g., alcohol or Wilson's disease) or by hepatitis C virus-induced irreversible neurodegenerative damage [38,39].

As for asthma, our result was in line with the finding that asthma significantly increased the risk of dementia in one Taiwan nationwide cohort study [40]. In another Taiwan nationwide longitudinal study, asthma in midlife and in late life increased the risk of cognitive impairment [41]. The impact of chronic poor pulmonary function on cognition may be the direct consequence of pulmonary limitation and overlapping risk factors in both general and chronic lung disease populations [42].

Unlike previous reports, hypertension and hyperlipidemia were not associated with cognitive decline in our cohort. The association of hypertension with the risk of dementia is significant in middle-aged populations (around 50 years old), rather than in the elderly population aged 65 years and older [43]. Blood pressure was shown to decrease several years before the onset of dementia [44]. It might support a nonlinear, age-dependent relationship between blood pressure and the risk of cognitive decline in the elderly. On the other hand, cholesterol level was shown to be conversely related to the risk of MCI and dementia in the elderly population aged 65 and older [45]. This finding may be due to a decrease in total cholesterol with age, insufficient nutrition, and decline in BMI several years before onset of dementia [46]. Moreover, in our cohort, most participants with hypertension or hyperlipidemia have been prescribed with antihypertensive or lipid-lowering agents, respectively. This may imply that medical control of hypertension and hyperlipidemia is beneficial for the risk of developing dementia.

There are some limitations in this study. First, there is the potential for diagnostic bias and misclassification of comorbidities because the medical history was taken from the non-demented participant or based on the medical record documentation or chronically-prescribed drugs, instead of a formal diagnostic assessment by clinicians. Second, the definition of comorbidity itself is complex. The impact of a given comorbidity on cognition varies in terms of the duration and severity of the comorbidity before the onset of dementia, pharmacotherapy, and synergistic effect of other comorbidities. Third, we did not group enrolled participants into different MCI subtypes and dementia subtypes. Different subtypes of cognitive impairment may be related to distinct risk factors, thus complicating the identification of direct relationships. Fourth, as the common limitation of all cross-sectional studies, the corroboration of the causality between comorbidity and cognitive impairment warrants further investigation in longitudinal studies.

## Conclusions

Multiple medical comorbid diseases are common in older adults with cognitive impairment. Identification and treatment of manageable comorbidities are important to delay the progression of the disability from dementia. Those with cerebrovascular disease, cirrhosis, asthma, and diabetes mellitus have higher likelihood of cognitive decline. Due to a constellation and

complexity of comorbidities, greater attention is required to improve a comprehensive, tailored, and patient-centered approach for dementia care.

## Author Contributions

**Conceptualization:** PNW TBC SY Y MJC TFC.

**Data curation:** PNW TBC SY Y.

**Formal analysis:** SY Y.

**Funding acquisition:** PNW.

**Investigation:** PNW TBC.

**Methodology:** PNW TBC SY Y.

**Project administration:** YS HJL SCY LY T.

**Resources:** KNL CCL.

**Writing – original draft:** PNW TBC SY Y.

**Writing – review & editing:** PNW TBC.

## References

1. Chung SD, Liu SP, Sheu JJ, Lin CC, Lin HC, Chen CH. Increased healthcare service utilizations for patients with dementia: a population-based study. *PLoS One*. 2014; 9(8):e105789. Epub 2014/08/27. PubMed Central PMCID: PMC4144915. <https://doi.org/10.1371/journal.pone.0105789> PMID: 25157405
2. Huang SS, Lee MC, Liao YC, Wang WF, Lai TJ. Caregiver burden associated with behavioral and psychological symptoms of dementia (BPSD) in Taiwanese elderly. *Arch Gerontol Geriatr*. 2012; 55(1):55–9. Epub 2011/05/24. <https://doi.org/10.1016/j.archger.2011.04.009> PMID: 21601931
3. Sun Y, Lee HJ, Yang SC, Chen TF, Lin KN, Lin CC, et al. A nationwide survey of mild cognitive impairment and dementia, including very mild dementia, in Taiwan. *PLoS One*. 2014; 9(6):e100303. Epub 2014/06/19. PubMed Central PMCID: PMC4062510. <https://doi.org/10.1371/journal.pone.0100303> PMID: 24940604
4. Wu YT, Lee HY, Norton S, Chen C, Chen H, He C, et al. Prevalence studies of dementia in mainland china, Hong Kong and taiwan: a systematic review and meta-analysis. *PLoS One*. 2013; 8(6):e66252. Epub 2013/06/19. PubMed Central PMCID: PMC3679068. <https://doi.org/10.1371/journal.pone.0066252> PMID: 23776645
5. Baumgart M, Snyder HM, Carrillo MC, Fazio S, Kim H, Johns H. Summary of the evidence on modifiable risk factors for cognitive decline and dementia: A population-based perspective. *Alzheimer's & dementia: the journal of the Alzheimer's Association*. 2015; 11(6):718–26. Epub 2015/06/06.
6. Schubert CC, Boustani M, Callahan CM, Perkins AJ, Carney CP, Fox C, et al. Comorbidity profile of dementia patients in primary care: are they sicker? *J Am Geriatr Soc*. 2006; 54(1):104–9. Epub 2006/01/20. <https://doi.org/10.1111/j.1532-5415.2005.00543.x> PMID: 16420205
7. Sanderson M, Wang J, Davis DR, Lane MJ, Cornman CB, Fadden MK. Co-morbidity associated with dementia. *Am J Alzheimers Dis Other Demen*. 2002; 17(2):73–8. Epub 2002/04/17. <https://doi.org/10.1177/153331750201700210> PMID: 11954672
8. Nash DT, Fillit H. Cardiovascular disease risk factors and cognitive impairment. *Am J Cardiol*. 2006; 97(8):1262–5. Epub 2006/04/18. <https://doi.org/10.1016/j.amjcard.2005.12.031> PMID: 16616038
9. Breteler MM, Claus JJ, Grobbee DE, Hofman A. Cardiovascular disease and distribution of cognitive function in elderly people: the Rotterdam Study. *BMJ*. 1994; 308(6944):1604–8. Epub 1994/06/18. PubMed Central PMCID: PMC2540432. PMID: 8025427
10. Kloppenborg RP, van den Berg E, Kappelle LJ, Biessels GJ. Diabetes and other vascular risk factors for dementia: which factor matters most? A systematic review. *Eur J Pharmacol*. 2008; 585(1):97–108. Epub 2008/04/09. <https://doi.org/10.1016/j.ejphar.2008.02.049> PMID: 18395201

11. Snowdon DA, Greiner LH, Mortimer JA, Riley KP, Greiner PA, Markesbery WR. Brain infarction and the clinical expression of Alzheimer disease. The Nun Study. *JAMA*. 1997; 277(10):813–7. Epub 1997/03/12. PMID: [9052711](#)
12. Lyketsos CG, Toone L, Tschanz J, Rabins PV, Steinberg M, Onyike CU, et al. Population-based study of medical comorbidity in early dementia and "cognitive impairment, no dementia (CIND)": association with functional and cognitive impairment: The Cache County Study. *Am J Geriatr Psychiatry*. 2005; 13(8):656–64. Epub 2005/08/09. <https://doi.org/10.1176/appi.ajgp.13.8.656> PMID: [16085781](#)
13. Maslow K. Dementia and serious coexisting medical conditions: a double whammy. *Nurs Clin North Am*. 2004; 39(3):561–79. Epub 2004/08/28. <https://doi.org/10.1016/j.cnur.2004.02.011> PMID: [15331302](#)
14. Liu HC, Fuh JL, Wang SJ, Liu CY, Larson EB, Lin KN, et al. Prevalence and subtypes of dementia in a rural Chinese population. *Alzheimer Dis Assoc Disord*. 1998; 12(3):127–34. Epub 1998/10/15. PMID: [9772013](#)
15. Liu CK, Lai CL, Tai CT, Lin RT, Yen YY, Howng SL. Incidence and subtypes of dementia in southern Taiwan: impact of socio-demographic factors. *Neurology*. 1998; 50(6):1572–9. Epub 1998/06/20. PMID: [9633696](#)
16. Wang PN, Wang SJ, Hong CJ, Liu TT, Fuh JL, Chi CW, et al. Risk factors for Alzheimer's disease: a case-control study. *Neuroepidemiology*. 1997; 16(5):234–40. Epub 1997/01/01. PMID: [9346343](#)
17. Chen TF, Chiu MJ, Tang LY, Chiu YH, Chang SF, Su CL, et al. Institution type-dependent high prevalence of dementia in long-term care units. *Neuroepidemiology*. 2007; 28(3):142–9. Epub 2007/05/10. <https://doi.org/10.1159/000102142> PMID: [17489025](#)
18. Fan LY, Sun Y, Lee HJ, Yang SC, Chen TF, Lin KN, et al. Marital Status, Lifestyle and Dementia: A Nationwide Survey in Taiwan. *PLoS One*. 2015; 10(9):e0139154. Epub 2015/09/29. PubMed Central PMCID: [PMCPmc4587383](#). <https://doi.org/10.1371/journal.pone.0139154> PMID: [26413719](#)
19. 郭乃文, 劉秀枝, 王珮芳, 徐道昌(1989) 中文版「簡短式智能評估」(MMSE)之簡介. *臨床醫學月刊* 23: 39–42.
20. Albert MS, DeKosky ST, Dickson D, Dubois B, Feldman HH, Fox NC, et al. The diagnosis of mild cognitive impairment due to Alzheimer's disease: recommendations from the National Institute on Aging-Alzheimer's Association workgroups on diagnostic guidelines for Alzheimer's disease. *Alzheimer's & dementia: the journal of the Alzheimer's Association*. 2011; 7(3):270–9. Epub 2011/04/26. PubMed Central PMCID: [PMCPmc3312027](#).
21. Charlson ME, Pompei P, Ales KL, MacKenzie CR. A new method of classifying prognostic comorbidity in longitudinal studies: development and validation. *J Chronic Dis*. 1987; 40(5):373–83. Epub 1987/01/01. PMID: [3558716](#)
22. Formiga F, Fort I, Robles MJ, Riu S, Sabartes O, Barranco E, et al. Comorbidity and clinical features in elderly patients with dementia: differences according to dementia severity. *J Nutr Health Aging*. 2009; 13(5):423–7. Epub 2009/04/25. PMID: [19390748](#)
23. Solomon A, Dobranici L, Kareholt I, Tudose C, Lazarescu M. Comorbidity and the rate of cognitive decline in patients with Alzheimer dementia. *Int J Geriatr Psychiatry*. 2011; 26(12):1244–51. Epub 2011/04/19. <https://doi.org/10.1002/gps.2670> PMID: [21500282](#)
24. Duthie A, Chew D, Soiza RL. Non-psychiatric comorbidity associated with Alzheimer's disease. *QJM*. 2011; 104(11):913–20. Epub 2011/07/20. <https://doi.org/10.1093/qjmed/hcr118> PMID: [21768167](#)
25. Sakurai H, Hanyu H, Kanetaka H, Sato T, Shimizu S, Hirao K, et al. Prevalence of coexisting diseases in patients with Alzheimer's disease. *Geriatrics & gerontology international*. 2010; 10(2):216–7. Epub 2010/05/08.
26. Park HK, Na DL, Han SH, Kim JY, Cheong HK, Kim SY, et al. Clinical characteristics of a nationwide hospital-based registry of mild-to-moderate Alzheimer's disease patients in Korea: a CREDOS (Clinical Research Center for Dementia of South Korea) study. *J Korean Med Sci*. 2011; 26(9):1219–26. Epub 2011/09/22. PubMed Central PMCID: [PMCPmc3172661](#). <https://doi.org/10.3346/jkms.2011.26.9.1219> PMID: [21935279](#)
27. Stephan BC, Brayne C, Savva GM, Matthews FE. Occurrence of medical co-morbidity in mild cognitive impairment: implications for generalisation of MCI research. *Age Ageing*. 2011; 40(4):501–7. Epub 2011/06/16. PubMed Central PMCID: [PMCPmc3290328](#). <https://doi.org/10.1093/ageing/afr057> PMID: [21673136](#)
28. Artaz MA, Boddart J, Heriche-Taillandier E, Dieudonne B, Verny M. [Medical comorbidity in Alzheimer's disease: baseline characteristics of the REAL.FR Cohort]. *Rev Med Interne*. 2006; 27(2):91–7. Epub 2005/12/20. <https://doi.org/10.1016/j.revmed.2005.10.007> PMID: [16359758](#)
29. Poblador-Plou B, Calderon-Larranaga A, Marta-Moreno J, Hanco-Saavedra J, Sicras-Mainar A, Soljak M, et al. Comorbidity of dementia: a cross-sectional study of primary care older patients. *BMC*

- Psychiatry. 2014; 14:84. Epub 2014/03/22. PubMed Central PMCID: PMC3994526. <https://doi.org/10.1186/1471-244X-14-84> PMID: 24645776
30. Iadecola C, Gorelick PB. Converging pathogenic mechanisms in vascular and neurodegenerative dementia. *Stroke*. 2003; 34(2):335–7. Epub 2003/02/08. PMID: 12574528
  31. Picano E, Bruno RM, Ferrari GF, Bonuccelli U. Cognitive impairment and cardiovascular disease: so near, so far. *Int J Cardiol*. 2014; 175(1):21–9. Epub 2014/05/27. <https://doi.org/10.1016/j.ijcard.2014.05.004> PMID: 24856805
  32. Iadecola C. The pathobiology of vascular dementia. *Neuron*. 2013; 80(4):844–66. Epub 2013/11/26. PubMed Central PMCID: PMC3842016. <https://doi.org/10.1016/j.neuron.2013.10.008> PMID: 24267647
  33. Reitz C, Brayne C, Mayeux R. Epidemiology of Alzheimer disease. *Nat Rev Neurol*. 2011; 7(3):137–52. Epub 2011/02/10. PubMed Central PMCID: PMC3339565. <https://doi.org/10.1038/nrneurol.2011.2> PMID: 21304480
  34. Li L, Holscher C. Common pathological processes in Alzheimer disease and type 2 diabetes: a review. *Brain research reviews*. 2007; 56(2):384–402. Epub 2007/10/09. <https://doi.org/10.1016/j.brainresrev.2007.09.001> PMID: 17920690
  35. Prasad S, Sajja RK, Naik P, Cucullo L. Diabetes Mellitus and Blood-Brain Barrier Dysfunction: An Overview. *Journal of pharmacovigilance*. 2014; 2(2):125–. PubMed Central PMCID: PMC4306190. <https://doi.org/10.4172/2329-6887.1000125> PMID: 25632404
  36. Blazquez E, Velazquez E, Hurtado-Carneiro V, Ruiz-Albusac JM. Insulin in the brain: its pathophysiological implications for States related with central insulin resistance, type 2 diabetes and Alzheimer's disease. *Front Endocrinol (Lausanne)*. 2014; 5:161. Epub 2014/10/28. PubMed Central PMCID: PMC4191295.
  37. Exalto LG, Whitmer RA, Kappele LJ, Biessels GJ. An update on type 2 diabetes, vascular dementia and Alzheimer's disease. *Exp Gerontol*. 2012; 47(11):858–64. Epub 2012/08/14. <https://doi.org/10.1016/j.exger.2012.07.014> PMID: 22884853
  38. Bajaj JS, Wade JB, Sanyal AJ. Spectrum of neurocognitive impairment in cirrhosis: Implications for the assessment of hepatic encephalopathy. *Hepatology*. 2009; 50(6):2014–21. Epub 2009/09/30. <https://doi.org/10.1002/hep.23216> PMID: 19787808
  39. Solinas A, Piras MR, Deplano A. Cognitive dysfunction and hepatitis C virus infection. *World journal of hepatology*. 2015; 7(7):922–5. Epub 2015/05/09. PubMed Central PMCID: PMC4419096. <https://doi.org/10.4254/wjh.v7.i7.922> PMID: 25954475
  40. Peng YH, Wu BR, Su CH, Liao WC, Muo CH, Hsia TC, et al. Adult asthma increases dementia risk: a nationwide cohort study. *J Epidemiol Community Health*. 2015; 69(2):123–8. Epub 2014/10/02. <https://doi.org/10.1136/jech-2014-204445> PMID: 25271249
  41. Chen MH, Li CT, Tsai CF, Lin WC, Chang WH, Chen TJ, et al. Risk of dementia among patients with asthma: a nationwide longitudinal study. *J Am Med Dir Assoc*. 2014; 15(10):763–7. Epub 2014/07/20. <https://doi.org/10.1016/j.jamda.2014.06.003> PMID: 25037169
  42. Dodd JW. Lung disease as a determinant of cognitive decline and dementia. *Alzheimers Res Ther*. 2015; 7(1):32. Epub 2015/03/24. PubMed Central PMCID: PMC4369069. <https://doi.org/10.1186/s13195-015-0116-3> PMID: 25798202
  43. Duron E, Hanon O. Hypertension, cognitive decline and dementia. *Arch Cardiovasc Dis*. 2008; 101(3):181–9. Epub 2008/05/15. PMID: 18477946
  44. Kahonen-Vare M, Brunni-Hakala S, Lindroos M, Pitkala K, Strandberg T, Tilvis R. Left ventricular hypertrophy and blood pressure as predictors of cognitive decline in old age. *Aging Clin Exp Res*. 2004; 16(2):147–52. Epub 2004/06/16. PMID: 15195990
  45. Duron E, Hanon O. Vascular risk factors, cognitive decline, and dementia. *Vascular health and risk management*. 2008; 4(2):363–81. Epub 2008/06/20. PubMed Central PMCID: PMC2496986. PMID: 18561512
  46. Panza F, D'Introno A, Colacicco AM, Capurso C, Pichichero G, Capurso SA, et al. Lipid metabolism in cognitive decline and dementia. *Brain research reviews*. 2006; 51(2):275–92. Epub 2006/01/18. <https://doi.org/10.1016/j.brainresrev.2005.11.007> PMID: 16410024
